# Supplementary material for: A high-throughput screening approach to discovering good forms of inspired visual representation
Source: PLOS journal article supplement (doi:10.1371/journal.pcbi.1000579), 2009-11-01
Supplement: S13 (10.1371/journal.pcbi.1000579.s013) [file journal.pcbi.1000579.s013]

301 Moved Permanently

# Moved Permanently

The document has moved here.

---

Apache Server at www.ploscompbiol.org Port 80
